# Supplementary material
Source: PubMed Central journal article supplement (PMC5836130)
Supplement: supp_RA117.000298_132935_1_supp_38839_p0yfks.pdf [file supp_RA117.000298_132935_1_supp_38839_p0yfks.pdf]

## Table S1

**A**

| Genotype                                                | N   | % Total |
|---------------------------------------------------------|-----|---------|
| <i>Ephx1</i> <sup>+/+</sup> <i>Ephx2</i> <sup>+/+</sup> | 35  | 6.5     |
| <i>Ephx1</i> <sup>+/+</sup> <i>Ephx2</i> <sup>+/-</sup> | 74  | 13.7    |
| <i>Ephx1</i> <sup>+/+</sup> <i>Ephx2</i> <sup>-/-</sup> | 33  | 6.1     |
| <i>Ephx1</i> <sup>+/-</sup> <i>Ephx2</i> <sup>+/+</sup> | 64  | 11.9    |
| <i>Ephx1</i> <sup>+/-</sup> <i>Ephx2</i> <sup>+/-</sup> | 156 | 28.9    |
| <i>Ephx1</i> <sup>+/-</sup> <i>Ephx2</i> <sup>-/-</sup> | 56  | 10.4    |
| <i>Ephx1</i> <sup>-/-</sup> <i>Ephx2</i> <sup>+/+</sup> | 32  | 5.9     |
| <i>Ephx1</i> <sup>-/-</sup> <i>Ephx2</i> <sup>+/-</sup> | 62  | 11.5    |
| <i>Ephx1</i> <sup>-/-</sup> <i>Ephx2</i> <sup>-/-</sup> | 28  | 5.2     |

**Table S1.** Breeding statistics of the first 90 litters generated by *Ephx1*<sup>+/-</sup> *Ephx2*<sup>+/-</sup> X *Ephx1*<sup>+/-</sup> *Ephx2*<sup>+/-</sup> in-crossing.

## Table S2

|                                                | Age        | Weight     | Heart/body | Lung/body | Liver/body | Kidney/body |
|------------------------------------------------|------------|------------|------------|-----------|------------|-------------|
| <i>WT</i>                                      | 70.3 (3)   | 20.9 (1.0) | 4.7 (0.1)  | 7.1 (0.6) | 47.1 (1.1) | 13.7 (0.7)  |
| <i>Ephx1<sup>-/-</sup></i>                     | 72.7 (1.7) | 21.6 (1.0) | 4.6 (0.1)  | 6.6 (0.3) | 44.2 (1.2) | 13.2 (0.4)  |
| <i>Ephx2<sup>-/-</sup></i>                     | 67.6 (1.2) | 18.6 (1.4) | 4.7 (0.1)  | 7.2 (0.7) | 47.3 (2.4) | 12.7 (0.4)  |
| <i>Ephx1<sup>-/-</sup> Ephx2<sup>-/-</sup></i> | 79.4 (2.2) | 22.6 (1.2) | 4.7 (0.2)  | 6.6 (0.5) | 49.1 (1.6) | 13 (0.7)    |

**Table S2.** Gross morphological analysis of wild type (WT), *Ephx1<sup>-/-</sup>*, *Ephx2<sup>-/-</sup>*, and *Ephx1<sup>-/-</sup> Ephx2<sup>-/-</sup>* mice. Age (days), weight (grams), and organ/body weights (mg/gram) are shown as mean (SEM), N=5-9 per group. None of the parameters were statistically different by genotype.

**Figure S1**

**A**

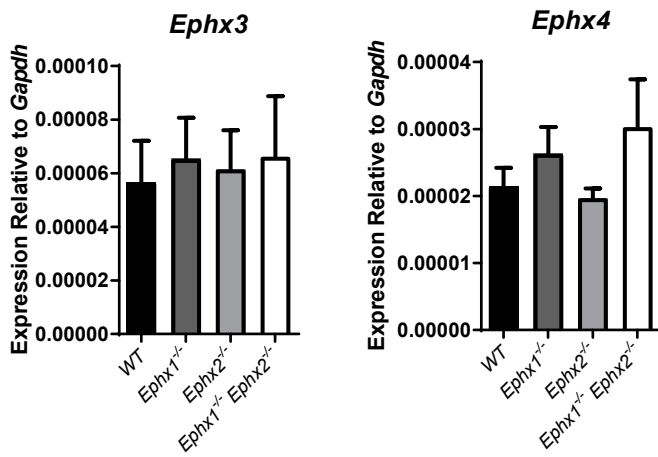

**B**

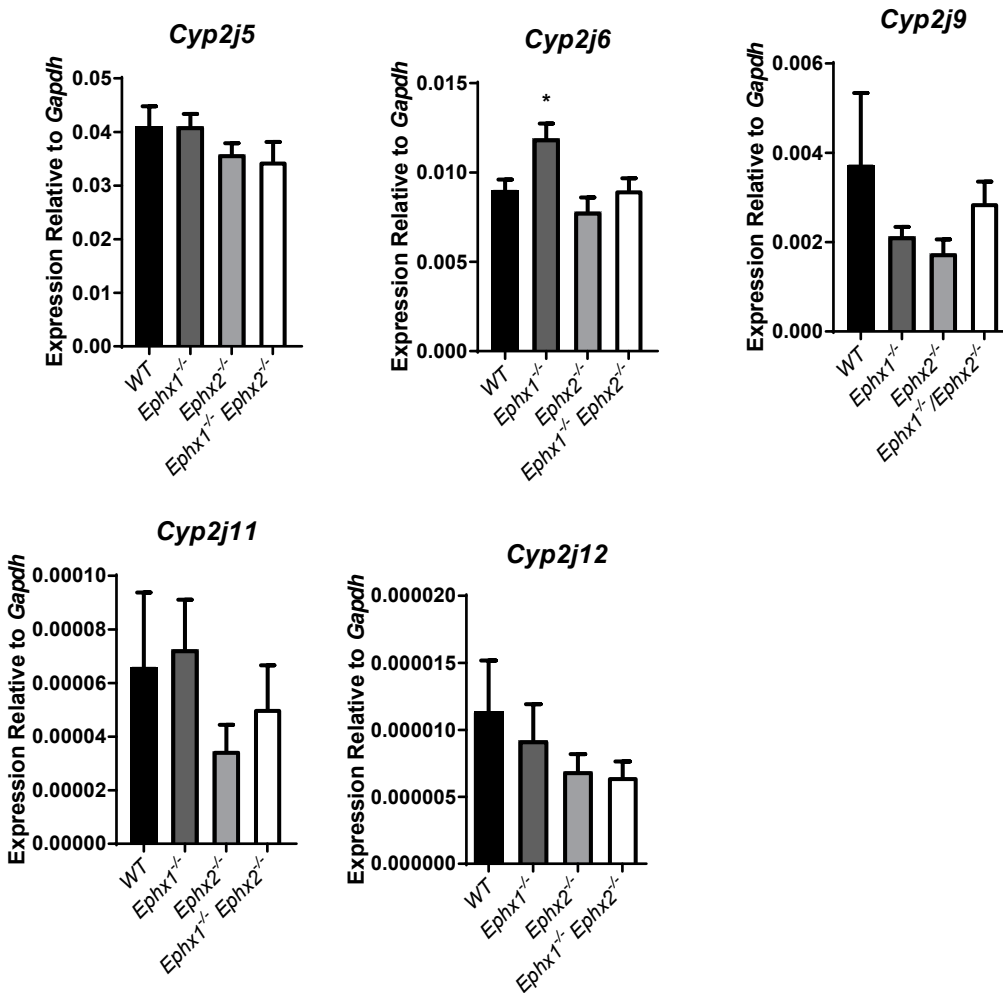

## Figure S1

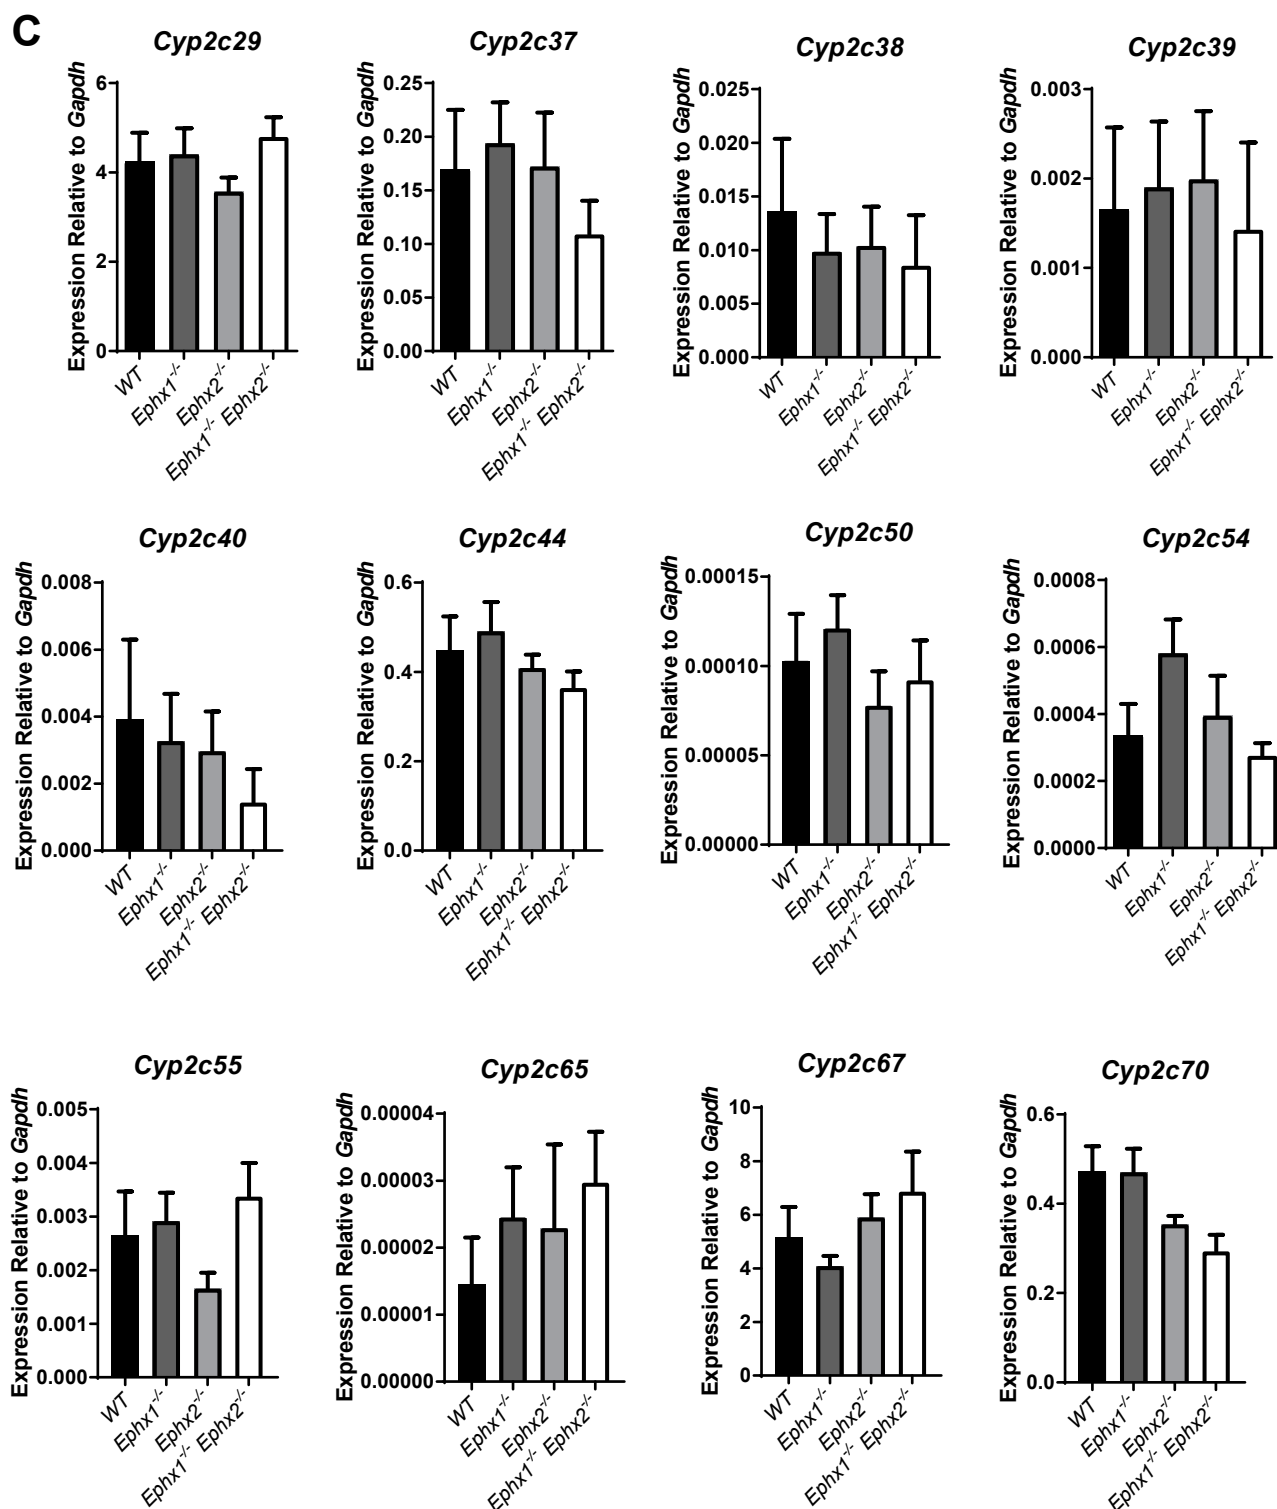

**Figure S1.** Expression of (A) epoxide hydrolases, (B) *Cyp2j* subfamily, and (c) *Cyp2c* subfamily enzymes in livers of WT, *Ephx1*<sup>-/-</sup>, *Ephx2*<sup>-/-</sup> and *Ephx1*<sup>-/-</sup> *Ephx2*<sup>-/-</sup> mice. Values are expressed as arbitrary units (mean ± SEM) of 4-8 mice per group after normalization for expression of *Gapdh*. \*p<0.05 vs WT.

## Figure S2

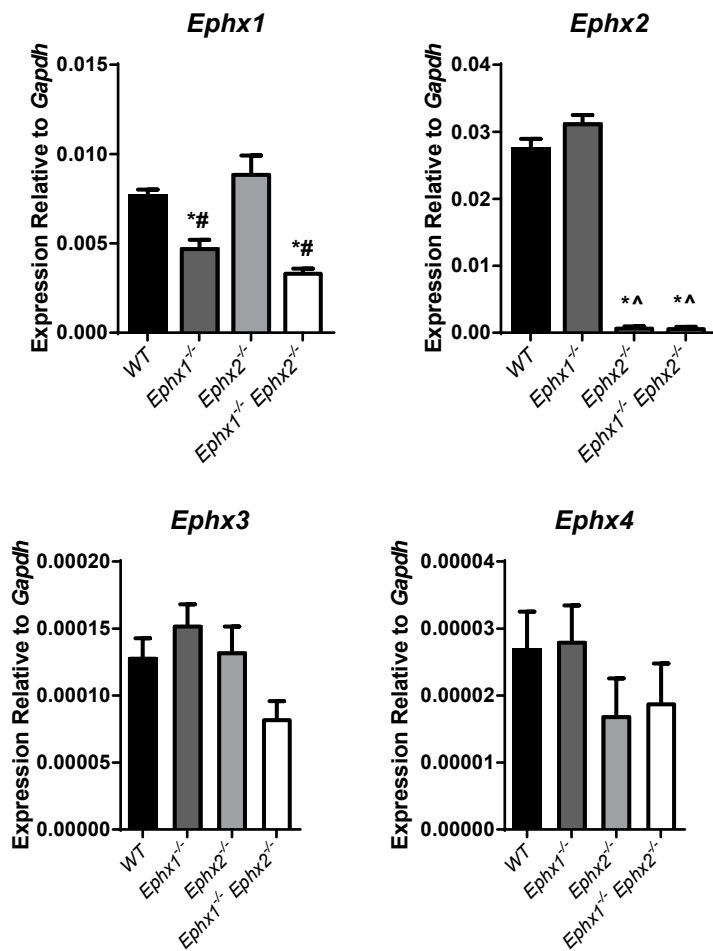

**Figure S2.** Heart expression of epoxide hydrolases in WT, *Ephx1*<sup>-/-</sup>, *Ephx2*<sup>-/-</sup> and *Ephx1*<sup>-/-</sup> *Ephx2*<sup>-/-</sup> mice. Values are expressed as arbitrary units (mean ± SEM) of 5 mice per group after normalization for expression of *Gapdh*. \*p<0.05 vs. WT, #p<0.05 vs. *Ephx2*<sup>-/-</sup> and ^p<0.05 vs. *Ephx1*<sup>-/-</sup>.

**Table S3**

|                         | <i>WT</i>      | <i>Ephx1</i> <sup>-/-</sup> | <i>Ephx2</i> <sup>-/-</sup> | <i>Ephx1</i> <sup>-/-</sup> <i>Ephx2</i> <sup>-/-</sup> |
|-------------------------|----------------|-----------------------------|-----------------------------|---------------------------------------------------------|
| <b>TXB<sub>2</sub></b>  | 19 (4)         | 20 (3)                      | 23 (5)                      | 46 (18)                                                 |
| <b>PGD<sub>2</sub></b>  | 121 (56)       | 121 (55)                    | 134 (57)                    | 57 (9)                                                  |
| <b>PGE<sub>2</sub></b>  | 35 (14)        | 28 (15)                     | 27 (8)                      | 45 (15)                                                 |
| <b>PGF<sub>2α</sub></b> | 373 (63)       | 306 (21)                    | 479 (114)                   | 369 (33)                                                |
| <b>19,20-EpDPE</b>      | 4287 (1474)    | 5206 (867)                  | 4394 (514)                  | 6762 (383)*#                                            |
| <b>17,18-EpETE</b>      | 425 (132)      | 632 (178)                   | 865 (120)*                  | 1324 (26)*#                                             |
| <b>14,15-EET</b>        | 496 (96)       | 594 (97)                    | 2323 (293)*                 | 2069 (211)*                                             |
| <b>11,12-EET</b>        | 296 (105)      | 352 (38)                    | 603 (139)                   | 1169 (157)*#                                            |
| <b>8,9-EET</b>          | 470 (115)      | 462 (69)                    | 1198 (215)*                 | 1045 (136)                                              |
| <b>5,6-EET</b>          | 906 (242)      | 1649 (455)                  | 2711 (1016)                 | 2114 (925)                                              |
| <b>12,13-EpOME</b>      | 8852 (1512)    | 7216 (462)                  | 118718 (13234)*             | 99289 (15021)*                                          |
| <b>9,10-EpOME</b>       | 2503 (532)     | 2341 (256)                  | 15283 (3394)*               | 14508 (3032)*                                           |
| <b>19,20-DiHDPA</b>     | 16343 (3353)   | 7643 (590)*                 | 12527 (1901)                | 305 (61)*#                                              |
| <b>17,18-DHET</b>       | 56669 (12310)  | 35840 (4123)                | 34093 (5962)                | 2082 (403)*#                                            |
| <b>14,15-DHET</b>       | 7849 (1512)    | 5457 (729)                  | 2600 (552)*                 | 329 (35)*#                                              |
| <b>11,12-DHET</b>       | 3186 (534)     | 2527 (279)                  | 1802 (380)                  | 116 (10)*#                                              |
| <b>8,9-DHET</b>         | 2317 (340)     | 1609 (134)*                 | 1438 (236)                  | 0 (0)*#                                                 |
| <b>5,6-DHET</b>         | 1080 (125)     | 785 (67)*                   | 754 (159)                   | 385 (59)*                                               |
| <b>12,13-DiHOME</b>     | 134215 (11757) | 144686 (20785)              | 18553 (2690)*               | 19369 (3604)*                                           |
| <b>9,10-DiHOME</b>      | 35937 (3022)   | 37174 (4504)                | 27823 (5215)                | 7916 (1352)*#                                           |
| <b>20-HETE</b>          | 2008 (292)     | 2022 (264)                  | 2332 (270)                  | 1766 (335)                                              |
| <b>19-HETE</b>          | 4151 (823)     | 4395 (547)                  | 4894 (991)                  | 2756 (572)                                              |
| <b>15-HETE</b>          | 1067 (79)      | 852 (67)                    | 1034 (163)                  | 1108 (176)                                              |
| <b>12-HETE</b>          | 77217 (29217)  | 67281 (14786)               | 45325 (10682)               | 132759 (66333)                                          |
| <b>11-HETE</b>          | 1090 (137)     | 859 (63)                    | 1118 (204)                  | 1032 (115)                                              |
| <b>8-HETE</b>           | 102647 (16089) | 85014 (9167)                | 94888 (14675)               | 105128 (14091)                                          |
| <b>5-HETE</b>           | 4031 (466)     | 3664 (365)                  | 4662 (1004)                 | 4219 (663)                                              |
| <b>13-HODE</b>          | 200620 (14629) | 177396 (17612)              | 196257 (15923)              | 233089 (47699)                                          |
| <b>9-HODE</b>           | 119843 (7052)  | 109401 (7919)               | 115882 (8913)               | 134696 (25168)                                          |

**Table S3.** Oxylipin levels in plasma from WT, *Ephx1*<sup>-/-</sup>, *Ephx2*<sup>-/-</sup> and *Ephx1*<sup>-/-</sup> *Ephx2*<sup>-/-</sup> mice. Values are expressed as mean (SEM) in pg/ml plasma. N=9-11 per group, \*p<0.05 vs. WT, #p<0.05 vs. *Ephx2*<sup>-/-</sup> and ^p<0.05 vs. *Ephx1*<sup>-/-</sup>.

**Table S4**

|                                | <i>WT</i>    |                           | <i>Ephx1<sup>-/-</sup></i> |                           | <i>Ephx2<sup>-/-</sup></i> |                           | <i>Ephx1<sup>-/-</sup> Ephx2<sup>-/-</sup></i> |                                        |
|--------------------------------|--------------|---------------------------|----------------------------|---------------------------|----------------------------|---------------------------|------------------------------------------------|----------------------------------------|
|                                | Baseline     | Reperfusion               | Baseline                   | Reperfusion               | Baseline                   | Reperfusion               | Baseline                                       | Reperfusion                            |
| <b>6-keto-PGF<sub>1α</sub></b> | 33024 (3872) | 38830 (4691)              | 23521 (3365)               | 49978 (3490) <sup>^</sup> | 29749 (7880)               | 51756 (7416) <sup>^</sup> | 32713 (4019)                                   | 40452 (9555)                           |
| <b>TXB<sub>2</sub></b>         | 349 (53)     | 2413 (310) <sup>^</sup>   | 384 (71)                   | 1778 (302) <sup>^</sup>   | 530 (64)                   | 1528 (363) <sup>^</sup>   | 482 (79)                                       | 1247 (236) <sup>^</sup> <sup>^</sup>   |
| <b>PGD<sub>2</sub></b>         | 8055 (1277)  | 43716 (5341) <sup>^</sup> | 8012 (948)                 | 30296 (3225) <sup>^</sup> | 10459 (752)                | 27051 (5017) <sup>^</sup> | 9796 (2236)                                    | 18445 (3125) <sup>^</sup> <sup>^</sup> |
| <b>PGE<sub>2</sub></b>         | 2675 (304)   | 4809 (807) <sup>^</sup>   | 2183 (372)                 | 4732 (558) <sup>^</sup>   | 2682 (416)                 | 4107 (517)                | 2976 (597)                                     | 3500 (493)                             |
| <b>PGF<sub>2α</sub></b>        | 2795 (375)   | 5826 (1054) <sup>^</sup>  | 3101 (533)                 | 5333 (533) <sup>^</sup>   | 4035 (662)                 | 5165 (531)                | 3242 (560)                                     | 4705 (707)                             |
| <b>8-iso-PGF<sub>2α</sub></b>  | 146 (14)     | 360 (41) <sup>^</sup>     | 156 (21)                   | 303 (38) <sup>^</sup>     | 206 (22)                   | 300 (41)                  | 152 (34)                                       | 265 (45)                               |
| <b>19,20-EpDPE</b>             | 391 (37)     | 1426 (271) <sup>^</sup>   | 890 (82) <sup>*</sup>      | 1583 (191) <sup>^</sup>   | 542 (208)                  | 1306 (256) <sup>^</sup>   | 1023 (189) <sup>*</sup>                        | 1561 (230) <sup>^</sup>                |
| <b>17,18-EpETE</b>             | 86 (15)      | 214 (41) <sup>^</sup>     | 96 (16)                    | 227 (49) <sup>^</sup>     | 157 (14) <sup>*</sup>      | 189 (18)                  | 213 (45) <sup>*</sup>                          | 401 (84) <sup>#</sup> <sup>^</sup>     |
| <b>14,15-EET</b>               | 385 (124)    | 4255 (990) <sup>^</sup>   | 774 (335)                  | 3078 (750) <sup>^</sup>   | 1078 (345)                 | 3165 (466) <sup>^</sup>   | 856 (177)                                      | 2504 (695) <sup>^</sup>                |
| <b>11,12-EET</b>               | 421 (150)    | 1469 (342) <sup>^</sup>   | 237 (17)                   | 1071 (331)                | 585 (236)                  | 1337 (278)                | 426 (72)                                       | 934 (222) <sup>^</sup>                 |
| <b>8,9-EET</b>                 | 288 (35)     | 1615 (389) <sup>^</sup>   | 350 (43)                   | 1090 (372)                | 583 (141)                  | 1417 (316) <sup>^</sup>   | 433 (119)                                      | 1172 (358) <sup>^</sup>                |
| <b>5,6-EET</b>                 | 306 (212)    | 3195 (1693)               | 509 (378)                  | 1923 (1224)               | 791 (388)                  | 2620 (1903)               | 592 (303)                                      | 1429 (859)                             |
| <b>12,13-EpOME</b>             | 5695 (1069)  | 19602 (6332)              | 7260 (2120)                | 11397 (1521)              | 11279 (1077) <sup>*</sup>  | 14962 (1114) <sup>^</sup> | 9868 (1087) <sup>*</sup>                       | 16274 (2879) <sup>^</sup>              |
| <b>9,10-EpOME</b>              | 4150 (730)   | 13160 (4294)              | 5239 (1369)                | 8281 (1270)               | 7645 (1112) <sup>*</sup>   | 10818 (1015)              | 6101 (538)                                     | 11468 (2725)                           |
| <b>19,20-DiHDPA</b>            | 802 (91)     | 1301 (161) <sup>^</sup>   | 536 (63) <sup>*</sup>      | 1012 (77) <sup>^</sup>    | 933 (201)                  | 1424 (404)                | 7 (7) <sup>*#</sup>                            | 0 (0) <sup>*#</sup>                    |
| <b>17,18-DHET</b>              | 7122 (747)   | 15577 (1857) <sup>^</sup> | 7787 (786)                 | 17201 (2201) <sup>^</sup> | 6010 (365)                 | 11960 (1735) <sup>^</sup> | 253 (253) <sup>*#</sup>                        | 635 (432) <sup>*#</sup>                |
| <b>14,15-DHET</b>              | 113 (21)     | 194 (21) <sup>^</sup>     | 117 (17)                   | 211 (25) <sup>^</sup>     | 100 (7)                    | 162 (16) <sup>^</sup>     | 24 (9) <sup>*#</sup>                           | 93 (9) <sup>*#</sup> <sup>^</sup>      |
| <b>11,12-DHET</b>              | 292 (68)     | 724 (184) <sup>^</sup>    | 207 (43)                   | 411 (45) <sup>^</sup>     | 178 (6)                    | 258 (33) <sup>^</sup>     | 31 (15) <sup>*#</sup>                          | 112 (11) <sup>*#</sup> <sup>^</sup>    |
| <b>8,9-DHET</b>                | 125 (27)     | 165 (28)                  | 101 (24)                   | 153 (21) <sup>^</sup>     | 116 (19)                   | 159 (33)                  | 37 (16) <sup>*#</sup>                          | 35 (14) <sup>*#</sup>                  |
| <b>5,6-DHET</b>                | 44 (6)       | 104 (26)                  | 61 (11)                    | 77 (10)                   | 73 (16)                    | 80 (12)                   | 31 (3) <sup>#</sup>                            | 75 (16) <sup>^</sup>                   |
| <b>12,13-DHOME</b>             | 1498 (526)   | 1767 (433)                | 979 (164)                  | 1189 (131)                | 668 (100)                  | 1013 (116) <sup>^</sup>   | 715 (122)                                      | 1094 (192) <sup>^</sup>                |
| <b>9,10-DHOME</b>              | 865 (179)    | 1295 (289)                | 951 (268)                  | 1017 (103)                | 771 (38)                   | 815 (160)                 | 634 (73)                                       | 782 (127)                              |
| <b>20-HETE</b>                 | 807 (119)    | 1125 (81)                 | 969 (115)                  | 1109 (78)                 | 1053 (205)                 | 1159 (130)                | 1010 (186)                                     | 1408 (321)                             |
| <b>19-HETE</b>                 | 519 (114)    | 496 (91)                  | 400 (80)                   | 536 (68)                  | 419 (63)                   | 503 (55)                  | 419 (66)                                       | 602 (126)                              |
| <b>15-HETE</b>                 | 722 (72)     | 1260 (167) <sup>^</sup>   | 644 (66)                   | 1006 (123) <sup>^</sup>   | 966 (181)                  | 1330 (202)                | 720 (62)                                       | 847 (91) <sup>*#</sup>                 |
| <b>12-HETE</b>                 | 10320 (1992) | 8884 (1661)               | 7803 (2292)                | 7278 (2324)               | 13352 (2037)               | 11541 (1748)              | 7396 (1222) <sup>#</sup>                       | 5898 (670) <sup>#</sup>                |
| <b>11-HETE</b>                 | 558 (69)     | 997 (150) <sup>^</sup>    | 424 (43)                   | 760 (98)                  | 731 (116)                  | 1077 (197)                | 580 (72)                                       | 643 (93)                               |
| <b>8-HETE</b>                  | 5425 (540)   | 13044 (2342) <sup>^</sup> | 6084 (1903)                | 12724 (1991) <sup>^</sup> | 11234 (1881) <sup>*</sup>  | 17098 (3205)              | 5235 (374) <sup>#</sup>                        | 9822 (1882) <sup>^</sup>               |
| <b>5-HETE</b>                  | 325 (41)     | 1512 (157) <sup>^</sup>   | 375 (54)                   | 1152 (219) <sup>^</sup>   | 584 (100)                  | 1713 (497)                | 333 (43) <sup>#</sup>                          | 819 (122) <sup>*^</sup>                |
| <b>13-HODE</b>                 | 5414 (1158)  | 7842 (2110)               | 6032 (974)                 | 5332 (820) <sup>^</sup>   | 7692 (1246)                | 7317 (612)                | 8073 (2187)                                    | 6514 (868)                             |
| <b>9-HODE</b>                  | 6501 (1374)  | 9041 (2139)               | 6770 (1086)                | 6520 (922) <sup>^</sup>   | 9306 (1508)                | 9125 (953)                | 9046 (2376)                                    | 8002 (1122)                            |

**Table S4.** Oxylipin levels in cardiac perfusates from WT, *Ephx1<sup>-/-</sup>*, *Ephx2<sup>-/-</sup>* and *Ephx1<sup>-/-</sup> Ephx2<sup>-/-</sup>* mice at baseline and after postischemic reperfusion. Values are expressed as mean (SEM) in pg/gram heart tissue/minute. N=6-7/group, \*p<0.05 vs. WT, #p<0.05 vs. *Ephx2<sup>-/-</sup>* and ^p<0.05 vs. Baseline of the same genotype.

**Table S5**

| Parameter                                       | WT            | <i>Ephx1</i> <sup>-/-</sup> | <i>Ephx2</i> <sup>-/-</sup> | <i>Ephx1</i> <sup>-/-</sup> <i>Ephx2</i> <sup>-/-</sup> |
|-------------------------------------------------|---------------|-----------------------------|-----------------------------|---------------------------------------------------------|
| N=                                              | 10            | 8                           | 9                           | 8                                                       |
| Heart Rate (baseline)                           | 336 (9)       | 332 (17)                    | 329 (16)                    | 325 (8)                                                 |
| LVDPbaseline (cm H <sub>2</sub> O)              | 118 (5)       | 125 (8)                     | 109 (6)                     | 118 (9)                                                 |
| dp/dt max (cm H <sub>2</sub> O/sec)             | 5601 (152)    | 6389 (468)                  | 5408 (265)                  | 5906 (512)                                              |
| dp/dt min (cm H <sub>2</sub> O/sec)             | 3558 (324)    | 3867 (249)                  | 3268 (175)                  | 3554 (339)                                              |
| Rate Pressure Product (cmH <sub>2</sub> O x HR) | 396441 (2041) | 44738 (2417)                | 36199 (3422)                | 38224 (2320)                                            |
| TIC (min)                                       | 7.43 (0.83)   | 5.88 (0.51)                 | 8.12 (0.68)                 | 7.38 (0.85)                                             |
| Cmax (cm H <sub>2</sub> O)                      | 112 (9)       | 123 (9)                     | 132 (13)                    | 122 (14)                                                |

**Table S5.** Cardiac parameters from WT, *Ephx1*<sup>-/-</sup>, *Ephx2*<sup>-/-</sup> and *Ephx1*<sup>-/-</sup> *Ephx2*<sup>-/-</sup> mice at baseline or during ischemia. Values are expressed as mean +/- SEM, N=8-10/group. No significant differences were observed. Abbreviations: LVDP, Left Ventricular Developed Pressure; dp/dt, change in pressure/change in time; HR, Heart Rate; TIC, Time to Ischemic Contracture; Cmax, maximum ischemic contracture.



**Figure S3**

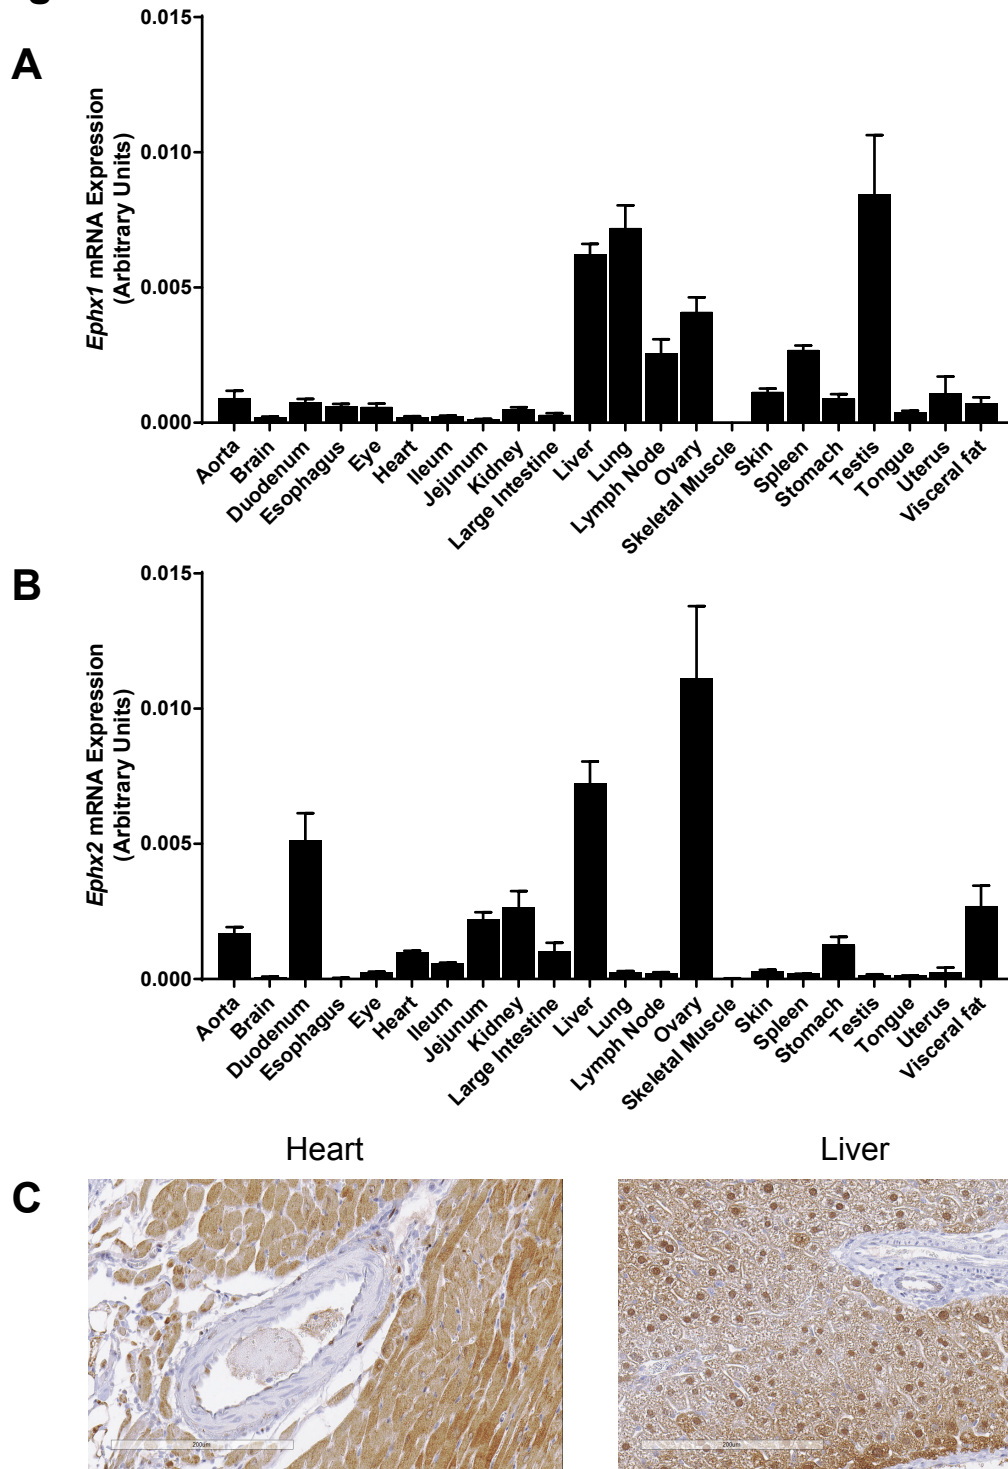

**Figure S3.** Expression of *Ephx1* (A) and *Ephx2* (B) in tissues collected from WT mice. Values are expressed as arbitrary units after normalization to *Gapdh* ( $2^{-\Delta Ct}$ ). Data are expressed as mean  $\pm$  SEM, N=3-6/group. C) Heart and Liver from mice stained with anti-EPHX2 Ab (sc-22344; 1:100). Strong EPHX2 staining is observed in cardiomyocytes and hepatocytes, variable staining is observed in endothelial cells, and little or no EPHX2 is detected in smooth muscle or fibroblasts.
